# Supplementary material
Source: MDPI journal article supplement (https://www.mdpi.com/2072-4292/15/9/2410)
Supplement: s1 [file s1]

Supplementary material article  
**“Sentinel-2 and Sentinel-1 Bare Soil Temporal Mosaics of  
6-year Periods for Soil Organic Carbon Content Mapping in Central France”**

**Table S1. Supplementary material**

Soil moisture products (SMPs) derived from S1/S2 between February and May 2017-2021.

| S2 Acquisition Date<br>(d <sub>s2</sub> )<br>(year/month/day) | SMPs Date (d <sub>sm</sub> )<br>(year/month/day) | Days<br> d <sub>s2</sub> - d <sub>sm</sub> | Soil Moisture (vol.%) |           |      |      |
|---------------------------------------------------------------|--------------------------------------------------|--------------------------------------------|-----------------------|-----------|------|------|
|                                                               |                                                  |                                            | Min                   | $\bar{x}$ | Max  | SD   |
| 20170327                                                      | 20170327                                         | 0                                          | 0.4                   | 15.13     | 30.6 | 7.7  |
| 20170409                                                      | 20170408                                         | 1                                          | 0.2                   | 10.8      | 29.4 | 7.35 |
| 20180225                                                      | 20180226                                         | 1                                          | 0.6                   | 12.1      | 29.2 | 4    |
| 20180421                                                      | 20180421                                         | 0                                          | 0.2                   | 13.3      | 28.8 | 7.5  |
| 20180504                                                      | 20180503                                         | 1                                          | 0.2                   | 12.4      | 29.4 | 6.4  |
| 20190215                                                      | 20190212                                         | 3                                          | 0.2                   | 22.3      | 29.6 | 3.4  |
| 20190225                                                      | 20190224                                         | 1                                          | 0.2                   | 13.3      | 28.8 | 7.5  |
| 20190401                                                      | 20190401                                         | 0                                          | 0.2                   | 11.5      | 29   | 5.7  |
| 20190411                                                      | 20190410                                         | 1                                          | 0.2                   | 13.8      | 29.2 | 7    |
| 20190419                                                      | 20190419/20 <sup>a</sup>                         | 0                                          | 0.2                   | 9.3       | 28.6 | 5.8  |
| 20190514                                                      | 20190514/13 <sup>a</sup>                         | 0                                          | 0.2                   | 15        | 29   | 8.1  |
| 20200319                                                      | 20200321                                         | 2                                          | 0.2                   | 18.1      | 28.6 | 5.3  |
| 20200324                                                      | 20200323                                         | 1                                          | 2                     | 18.8      | 29.2 | 5.7  |
| 20200326                                                      | 20200327                                         | 1                                          | 0.2                   | 13.1      | 28.6 | 5.6  |
| 20200405                                                      | 20200404                                         | 1                                          | 0.4                   | 13        | 28.6 | 6.15 |
| 20200410                                                      | 20200410                                         | 0                                          | 0.2                   | 11.1      | 28   | 5.6  |
| 20200415                                                      | 20200414                                         | 1                                          | 0.2                   | 11.8      | 28.4 | 6.6  |
| 20200423                                                      | 20200422                                         | 1                                          | 0.2                   | 8.7       | 28.2 | 5.6  |
| 20200520                                                      | 20200520                                         | 0                                          | 0.2                   | 15.3      | 28.8 | 8.8  |
| 20200528                                                      | 20200528                                         | 0                                          | 0.2                   | 15        | 30.4 | 9.8  |
| 20210224                                                      | 20210222                                         | 2                                          | 2.4                   | 26.5      | 31   | 2.1  |
| 20210227                                                      | 20210226                                         | 1                                          | 18.2                  | 30        | 37.2 | 3    |
| 20210301                                                      | 20210303                                         | 2                                          | 0.4                   | 17.5      | 29.4 | 5    |
| 20210306                                                      | 20210306                                         | 0                                          | 0.8                   | 15.8      | 29.4 | 5.5  |
| 20210324                                                      | 20210323                                         | 1                                          | 0.4                   | 15.9      | 28.6 | 6.16 |
| 20210329                                                      | 20210329                                         | 0                                          | 0.2                   | 14.8      | 28.6 | 6.6  |
| 20210423                                                      | 20210423                                         | 0                                          | 0.2                   | 7.8       | 28.4 | 5    |
| 20210425                                                      | 20210426                                         | 1                                          | 0.2                   | 7.8       | 28.4 | 4.8  |

<sup>a</sup>SMP was a mosaic of two different dates. The images highlighted in blue ( $\bar{x} \geq 20\text{vol.}\%$ ) were not considered to obtain S2Bsoil\_0, S2Bsoil\_1 and S2Bsoil\_2.

**Table S2. Supplementary material**

Soil moisture products (SMPs) derived from S1/S2 between July and November 2016-2021.

| S2 Acquisition<br>Date (d <sub>s2</sub> )<br>(year/month/day) | SMPs Date<br>(d <sub>sm</sub> )<br>(year/month/day) | Days<br> d <sub>s2</sub> - d <sub>sm</sub> | Soil Moisture (vol.%) |           |      |     |
|---------------------------------------------------------------|-----------------------------------------------------|--------------------------------------------|-----------------------|-----------|------|-----|
|                                                               |                                                     |                                            | Min                   | $\bar{x}$ | Max  | SD  |
| 20160812                                                      | 20160811                                            | 1                                          | 0.2                   | 15,2      | 29.8 | 6.3 |
| 20160822                                                      | 20160823                                            | 1                                          | 0.8                   | 15,6      | 30.4 | 5.8 |
| 20161130                                                      | 20161127                                            | 3                                          | 2.6                   | 26        | 30.6 | 2.9 |
| 20170822                                                      | 20170824                                            | 2                                          | 0.2                   | 15,4      | 30.6 | 6.1 |
| 20170827                                                      | 20170824                                            | 3                                          | 0.2                   | 15,4      | 30.6 | 6.1 |
| 20170829                                                      | 20170830                                            | 1                                          | 0.6                   | 24,5      | 30.8 | 4.2 |
| 20170921                                                      | 20170923                                            | 2                                          | 1.8                   | 18        | 31   | 5.6 |
| 20171016                                                      | 20171017                                            | 1                                          | 0.4                   | 16,9      | 30   | 6.3 |
| 20171107                                                      | 20171104                                            | 3                                          | 2                     | 23        | 31.2 | 5.2 |
| 20180725                                                      | 20180720                                            | 5                                          | 0.4                   | 14,7      | 30.4 | 6.8 |
| 20180804                                                      | 20180801                                            | 3                                          | 1.6                   | 13,4      | 30.2 | 6.6 |
| 20180819                                                      | 20180819                                            | 0                                          | 0.2                   | 13,9      | 30.2 | 6   |
| 20180901                                                      | 20180831                                            | 1                                          | 1.2                   | 13,8      | 30.6 | 6   |
| 20180911                                                      | 20180912                                            | 1                                          | 2                     | 13        | 30.4 | 5.4 |
| 20180926                                                      | 20180930                                            | 4                                          | 0.2                   | 11,6      | 28.6 | 4.9 |
| 20181008                                                      | 20181006                                            | 2                                          | 1.2                   | 12,3      | 30.2 | 5.2 |
| 20181018                                                      | 20181018                                            | 0                                          | 0.4                   | 12,1      | 29.4 | 5.2 |
| 20181021                                                      | 20181024                                            | 3                                          | 0.2                   | 12        | 30   | 5.4 |
| 20181225                                                      | 20181223                                            | 2                                          | 2.6                   | 27,5      | 31   | 1.4 |
| 20190723                                                      | 20190721                                            | 2                                          | 0.2                   | 11,7      | 29.2 | 7.1 |
| 20190725                                                      | 20190725                                            | 0                                          | 0.2                   | 10,5      | 28.8 | 9   |
| 20190906                                                      | 20190907                                            | 1                                          | 0.2                   | 12,4      | 29.4 | 5.7 |
| 20190916                                                      | 20190916                                            | 0                                          | 0.2                   | 11,9      | 29.6 | 5.6 |
| 20190918                                                      | 20190919                                            | 1                                          | 0.6                   | 12,1      | 29   | 5.3 |
| 20190921                                                      | 20190919                                            | 2                                          | 0.6                   | 12,1      | 29   | 5.3 |
| 20200722                                                      | 20200719                                            | 3                                          | 0.2                   | 12,6      | 28.8 | 8.5 |
| 20200727                                                      | 20200724                                            | 3                                          | 0.2                   | 13        | 30.6 | 7.4 |
| 20200806                                                      | 20200805                                            | 1                                          | 0.6                   | 13,2      | 30.6 | 7.2 |
| 20200915                                                      | 20200917                                            | 2                                          | 0.8                   | 13,7      | 28.8 | 5.5 |
| 20200917                                                      | 20200917                                            | 0                                          | 0.8                   | 13,7      | 28.8 | 5.5 |
| 20200922                                                      | 20200922                                            | 0                                          | 0.8                   | 12        | 29.6 | 5.6 |
| 20201104                                                      | 20201103                                            | 1                                          | 18.8                  | 31,2      | 38.4 | 3.2 |
| 20201106                                                      | 20201106                                            | 0                                          | 2                     | 20        | 31.4 | 4.7 |
| 20201121                                                      | 20201122                                            | 1                                          | 0.2                   | 21        | 28.6 | 4.1 |
| 20210719                                                      | 20210719                                            | 0                                          | 0.8                   | 15,5      | 31.2 | 6.6 |
| 20210722                                                      | 20210722                                            | 0                                          | 0.6                   | 15,7      | 31.2 | 6.5 |
| 20210902                                                      | 20210902                                            | 0                                          | 1.6                   | 15,8      | 29.4 | 5.4 |
| 20210907                                                      | 20210907                                            | 0                                          | 0.6                   | 18        | 28.6 | 5.4 |
| 20210922                                                      | 20210923                                            | 1                                          | 1.8                   | 20,2      | 31.4 | 5.9 |
| 20211022                                                      | 20211023                                            | 1                                          | 18.8                  | 28        | 37.8 | 3.8 |
| 20211109                                                      | 20211110                                            | 1                                          | 0.2                   | 20        | 30.8 | 4.4 |
| 20211129                                                      | 20211129                                            | 0                                          | 0.2                   | 18,6      | 28.6 | 3.6 |
| 20211221                                                      | 20211222                                            | 1                                          | 1.2                   | 20,9      | 28.4 | 3.6 |

The images highlighted in blue ( $\bar{x} \geq 20\text{vol.}\%$ ) were not considered to obtain S2Bsoil\_0, S2Bsoil\_1 and S2Bsoil\_2.

**Table S3. Supplementary material**

Sentinel-2 imagery and percentage of bare soil between February and May 2017-2021.

|           | <b>S2 Acquisition Date</b><br>(year/month/day) | <b>number of bare<br/>soil pixels</b> | <b>Bare soil pixels (%)</b> |
|-----------|------------------------------------------------|---------------------------------------|-----------------------------|
| <b>1</b>  | 20170327                                       | 2206062                               | 28,5                        |
| <b>2</b>  | 20170409                                       | 1535143                               | 19,8                        |
| <b>3</b>  | 20180225                                       | 2459774                               | 31,8                        |
| <b>4</b>  | 20180421                                       | 1233166                               | 15,9                        |
| <b>5</b>  | 20180504                                       | 1295620                               | 16,7                        |
| <b>6</b>  | 20190225                                       | 3815710                               | 49,3                        |
| <b>7</b>  | 20190401                                       | 2064454                               | 26,7                        |
| <b>8</b>  | 20190411                                       | 1576575                               | 20,4                        |
| <b>9</b>  | 20190419                                       | 1489898                               | 19,2                        |
| <b>10</b> | 20190514                                       | 1362221                               | 17,6                        |
| <b>11</b> | 20200319                                       | 1819914                               | 23,5                        |
| <b>12</b> | 20200324                                       | 1968727                               | 25,4                        |
| <b>13</b> | 20200326                                       | 2260217                               | 29,2                        |
| <b>14</b> | 20200405                                       | 2215266                               | 28,6                        |
| <b>15</b> | 20200410                                       | 2088088                               | 27,0                        |
| <b>16</b> | 20200415                                       | 2014895                               | 26,0                        |
| <b>17</b> | 20200423                                       | 1655253                               | 21,4                        |
| <b>18</b> | 20200520                                       | 1292335                               | 16,7                        |
| <b>19</b> | 20200528                                       | 779879                                | 10,1                        |
| <b>20</b> | 20210301                                       | 2461543                               | 31,8                        |
| <b>21</b> | 20210306                                       | 2372825                               | 30,7                        |
| <b>22</b> | 20210324                                       | 1773662                               | 22,9                        |
| <b>23</b> | 20210329                                       | 1754860                               | 22,7                        |
| <b>24</b> | 20210423                                       | 1512342                               | 19,5                        |
| <b>25</b> | 20210425                                       | 1491054                               | 19,3                        |

**Table S4. Supplementary material**

Sentinel-2 imagery and percentage of bare soil between July and November 2016-2021.

|           | <b>S2 Acquisition Date</b><br>(year/month/day) | <b>number of bare<br/>soil pixels</b> | <b>Bare soil pixels (%)</b> |
|-----------|------------------------------------------------|---------------------------------------|-----------------------------|
| <b>1</b>  | 20160812                                       | 2139160                               | 27,6                        |
| <b>2</b>  | 20160822                                       | 3210660                               | 41,5                        |
| <b>3</b>  | 20170822                                       | 2792977                               | 36,1                        |
| <b>4</b>  | 20170827                                       | 2307958                               | 29,8                        |
| <b>5</b>  | 20170921                                       | 2234418                               | 28,9                        |
| <b>6</b>  | 20171016                                       | 2995449                               | 38,7                        |
| <b>7</b>  | 20180725                                       | 1748347                               | 22,6                        |
| <b>8</b>  | 20180804                                       | 3418456                               | 44,2                        |
| <b>9</b>  | 20180819                                       | 4029990                               | 52,1                        |
| <b>10</b> | 20180901                                       | 4685783                               | 60,5                        |
| <b>11</b> | 20180911                                       | 4677533                               | 60,4                        |
| <b>12</b> | 20180926                                       | 5116533                               | 66,1                        |
| <b>13</b> | 20181008                                       | 4610693                               | 59,6                        |
| <b>14</b> | 20181018                                       | 5145886                               | 66,5                        |
| <b>15</b> | 20181021                                       | 5118788                               | 66,1                        |
| <b>16</b> | 20190723                                       | 482202                                | 6,2                         |
| <b>17</b> | 20190725                                       | 563092                                | 7,3                         |
| <b>18</b> | 20190906                                       | 4188705                               | 54,1                        |
| <b>19</b> | 20190916                                       | 4202362                               | 54,3                        |
| <b>20</b> | 20190918                                       | 4538944                               | 58,6                        |
| <b>21</b> | 20190921                                       | 4241709                               | 54,8                        |
| <b>22</b> | 20200722                                       | 1267751                               | 16,4                        |
| <b>23</b> | 20200727                                       | 1943647                               | 25,1                        |
| <b>24</b> | 20200806                                       | 2701928                               | 34,9                        |
| <b>25</b> | 20200915                                       | 3334918                               | 43,1                        |
| <b>26</b> | 20200917                                       | 4894517                               | 63,2                        |
| <b>27</b> | 20200922                                       | 4992960                               | 64,5                        |
| <b>28</b> | 20210719                                       | 486412                                | 6,3                         |
| <b>29</b> | 20210722                                       | 588435                                | 7,6                         |
| <b>30</b> | 20210902                                       | 3869188                               | 50,0                        |
| <b>31</b> | 20210907                                       | 4044489                               | 52,2                        |
| <b>32</b> | 20211129                                       | 2101360                               | 27,1                        |

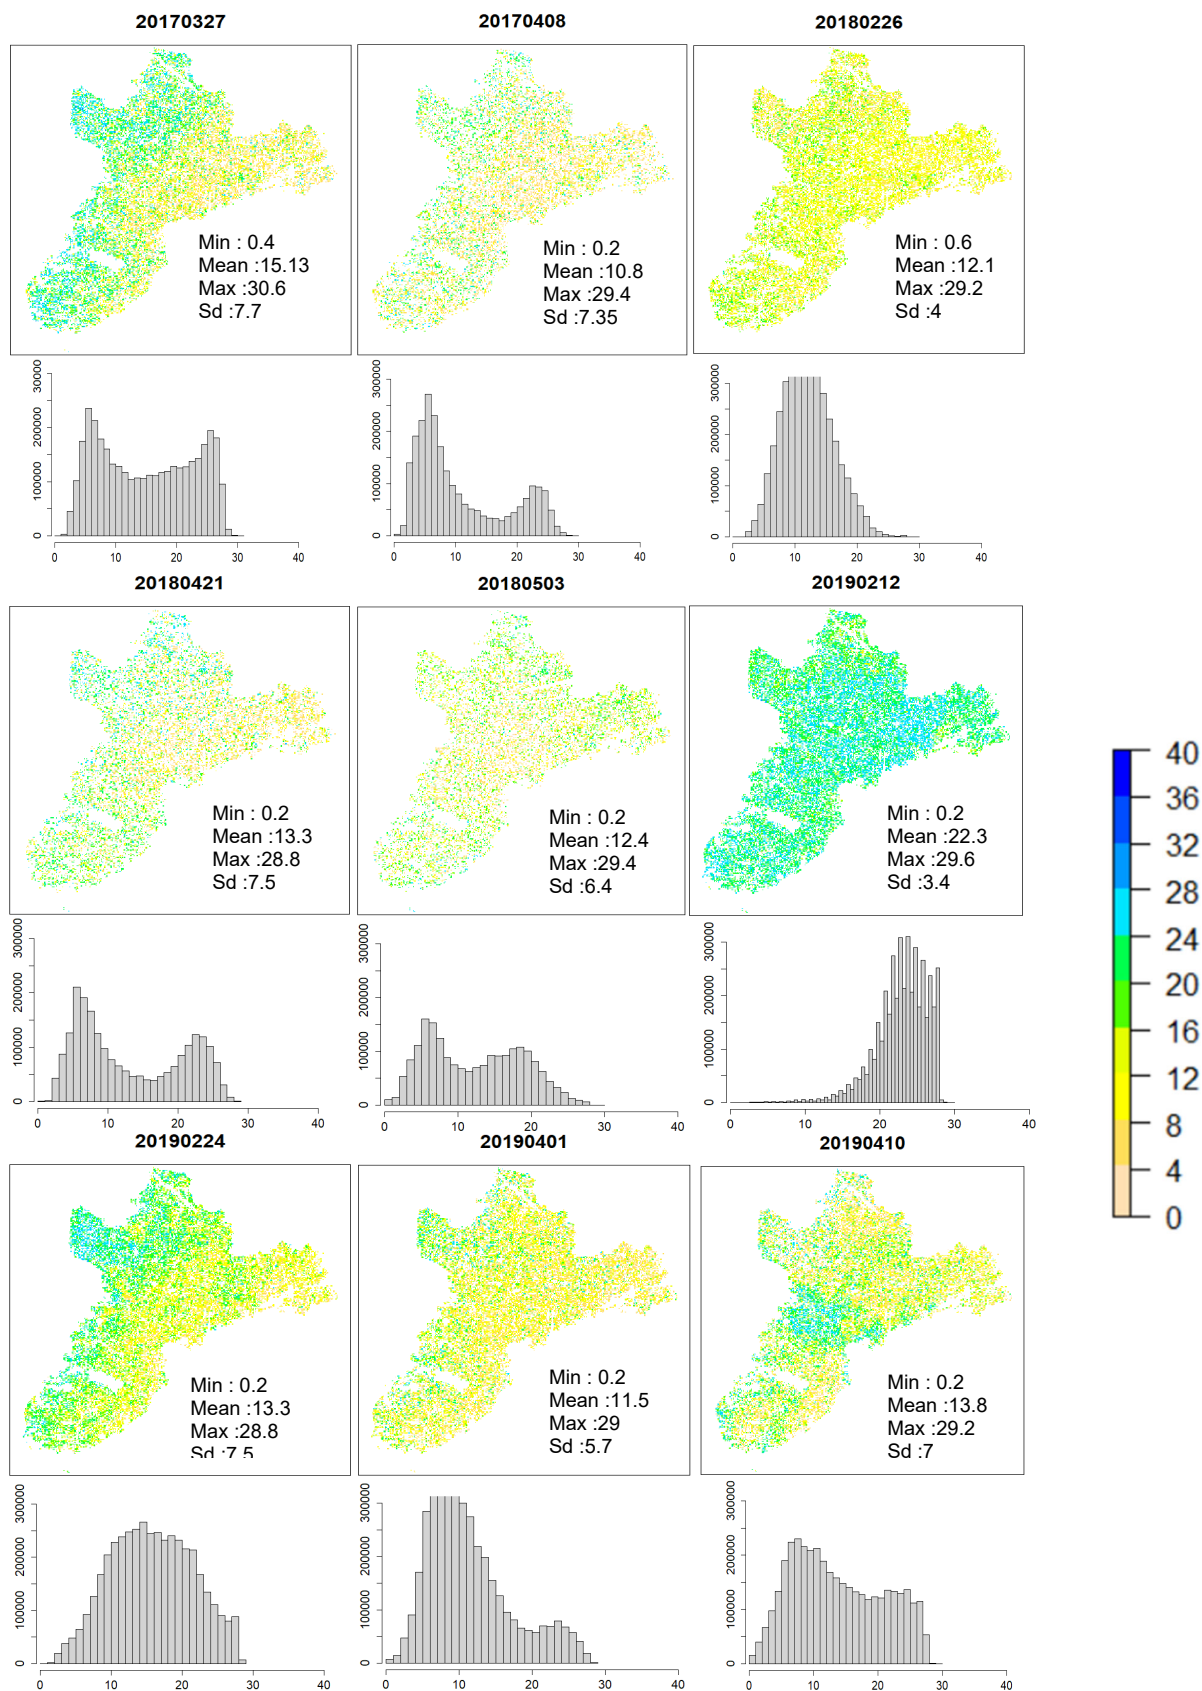

**Figure S1. Supplementary material**

Soil moisture products and their respective histograms between February and May 2017-2021. (values are in vol.%)

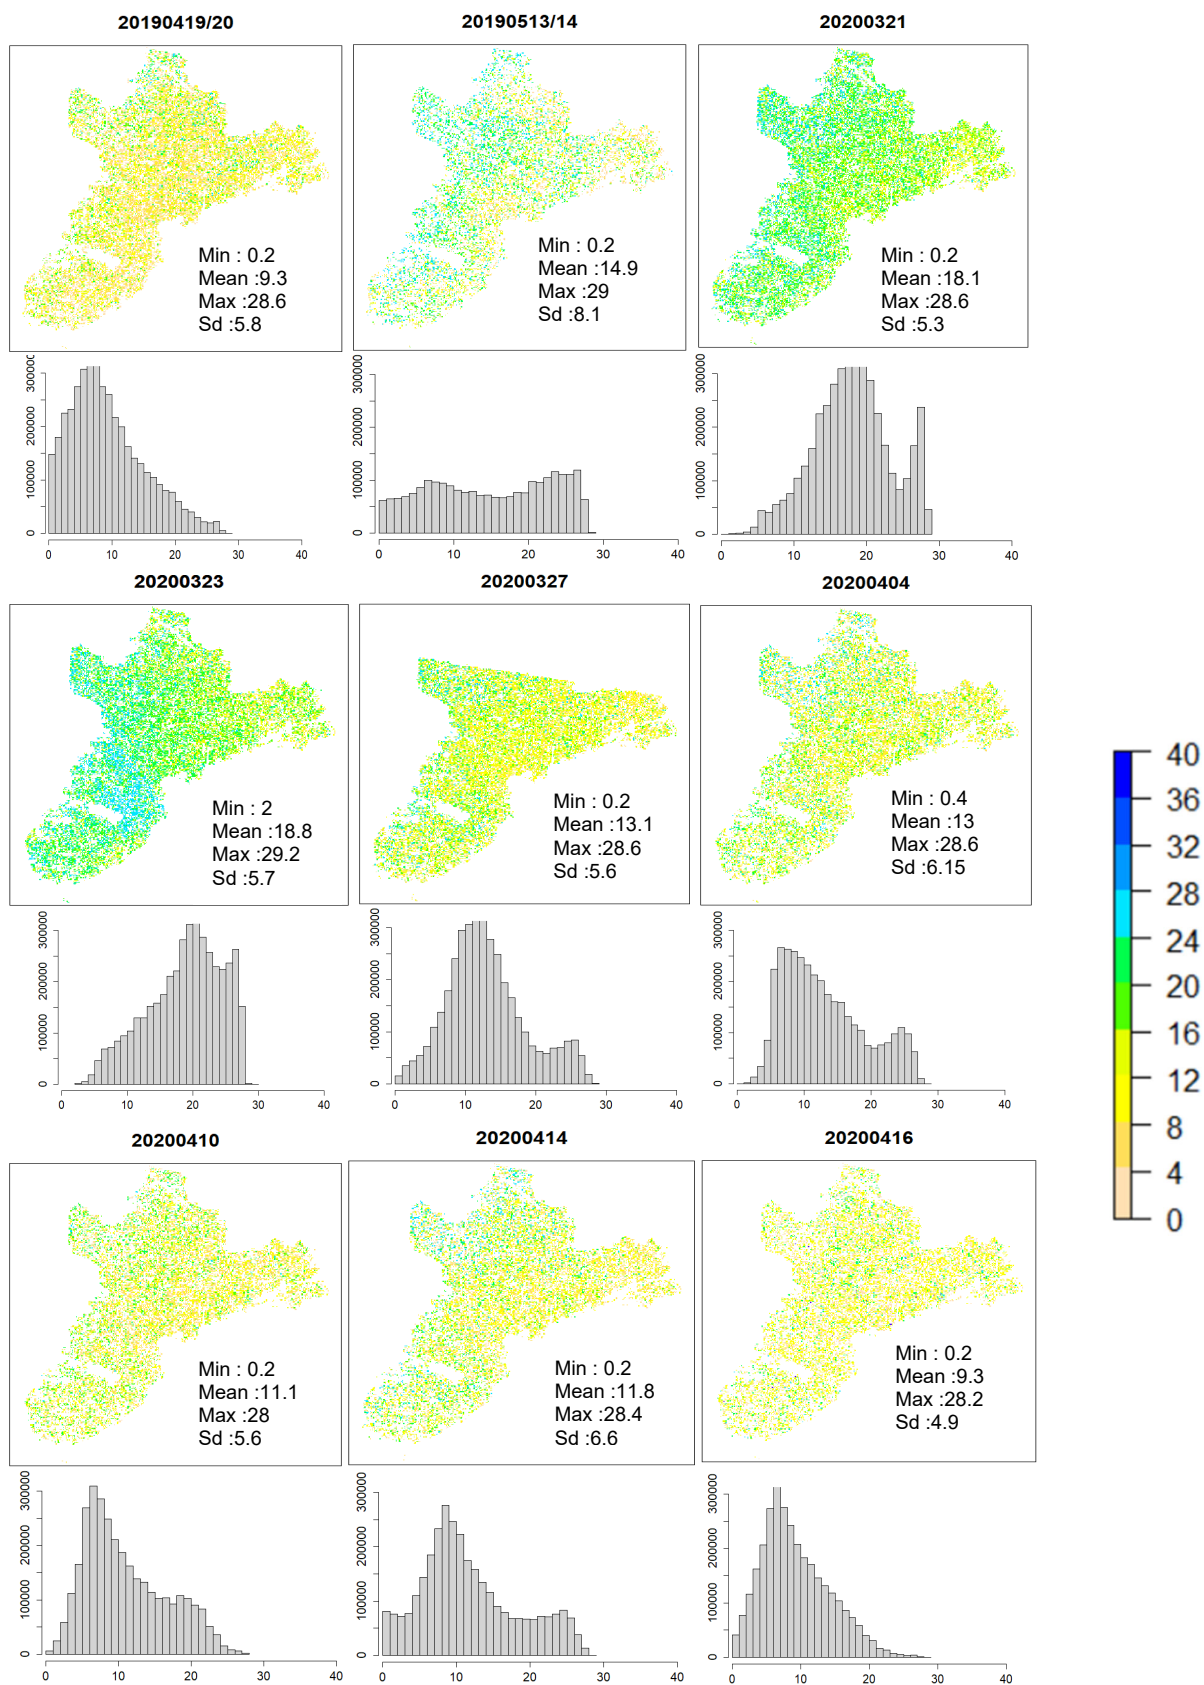

Figure S1. continued

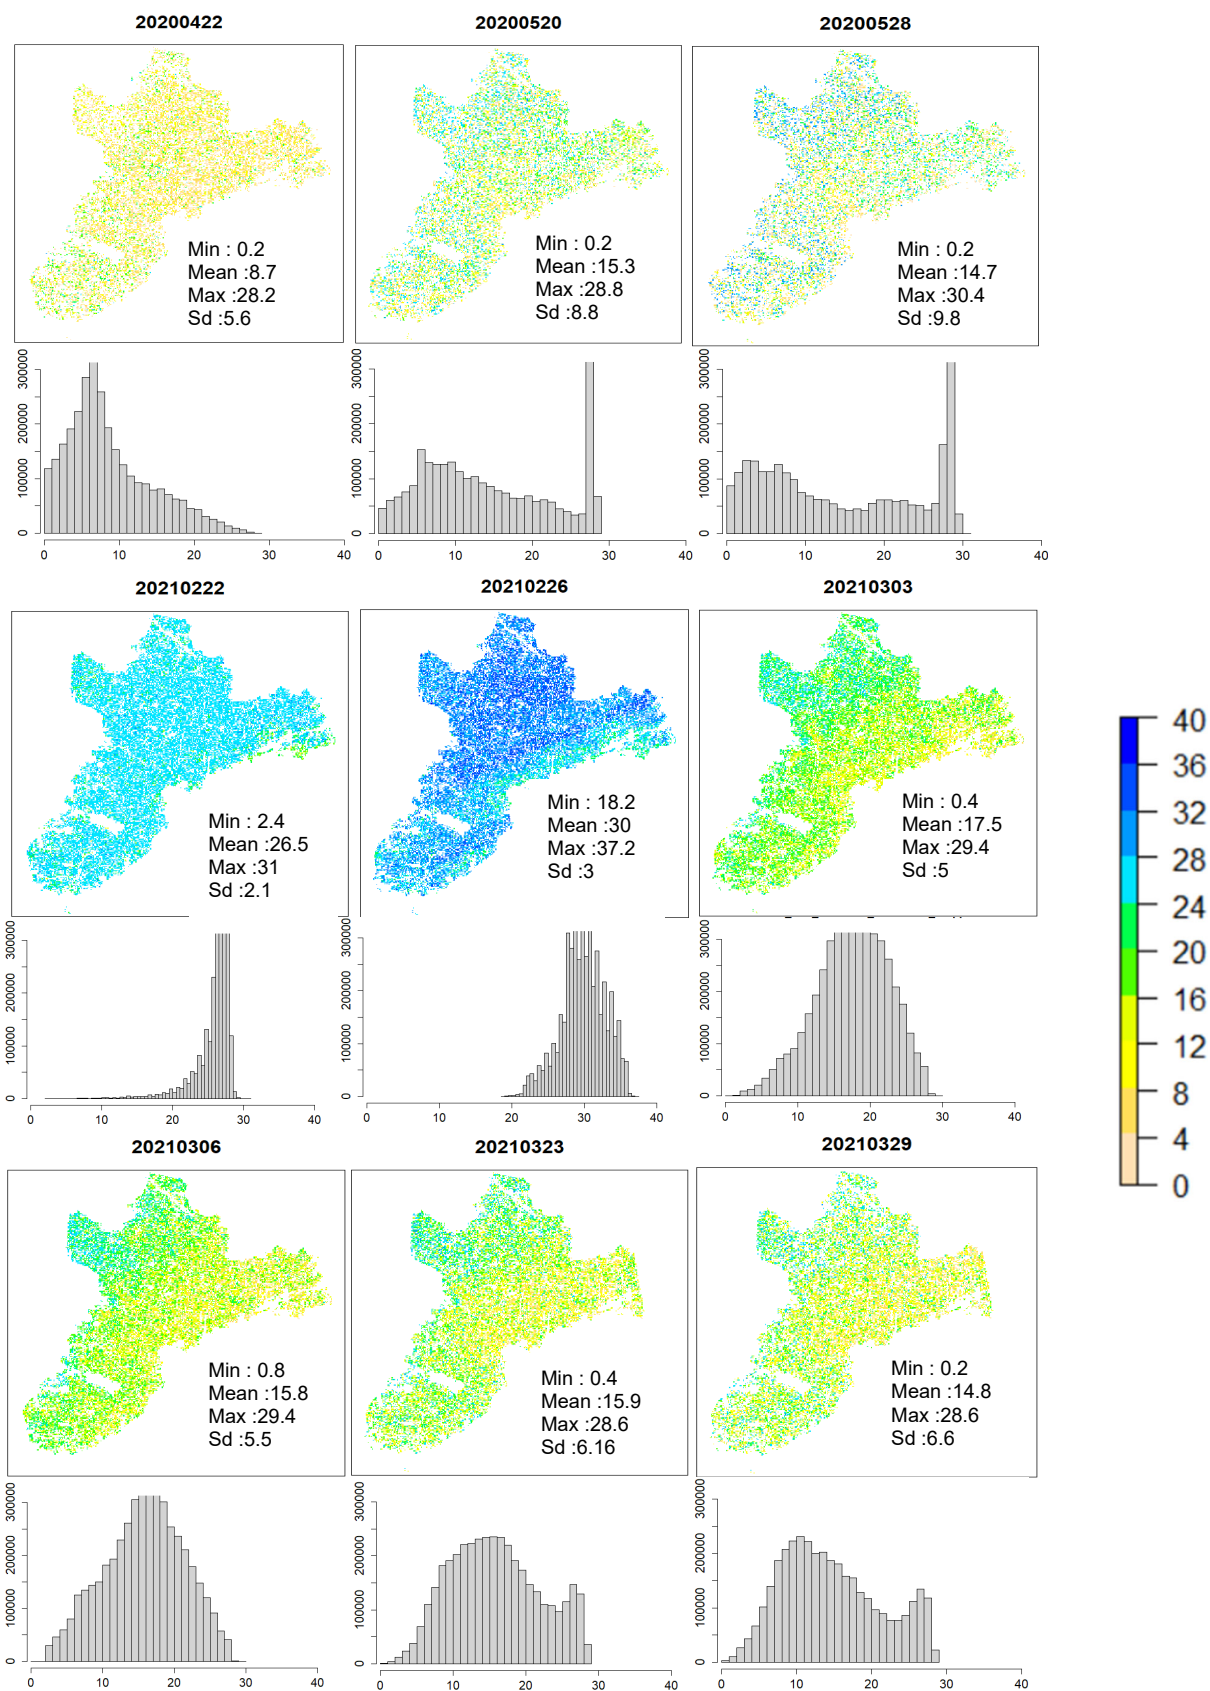

Figure S1. continued



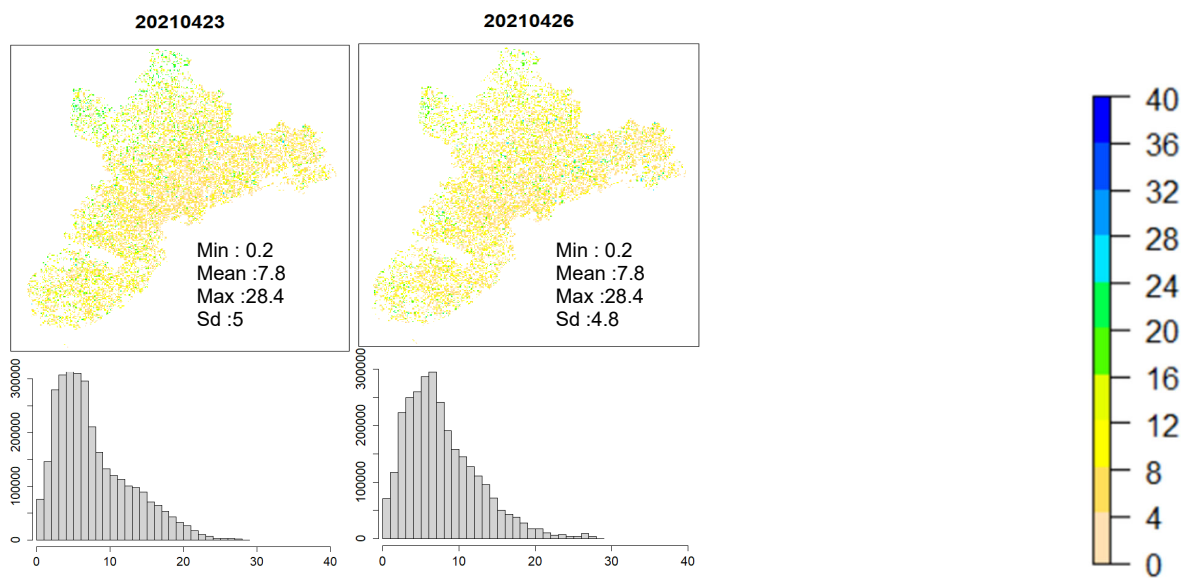

**Figure S1.** continued



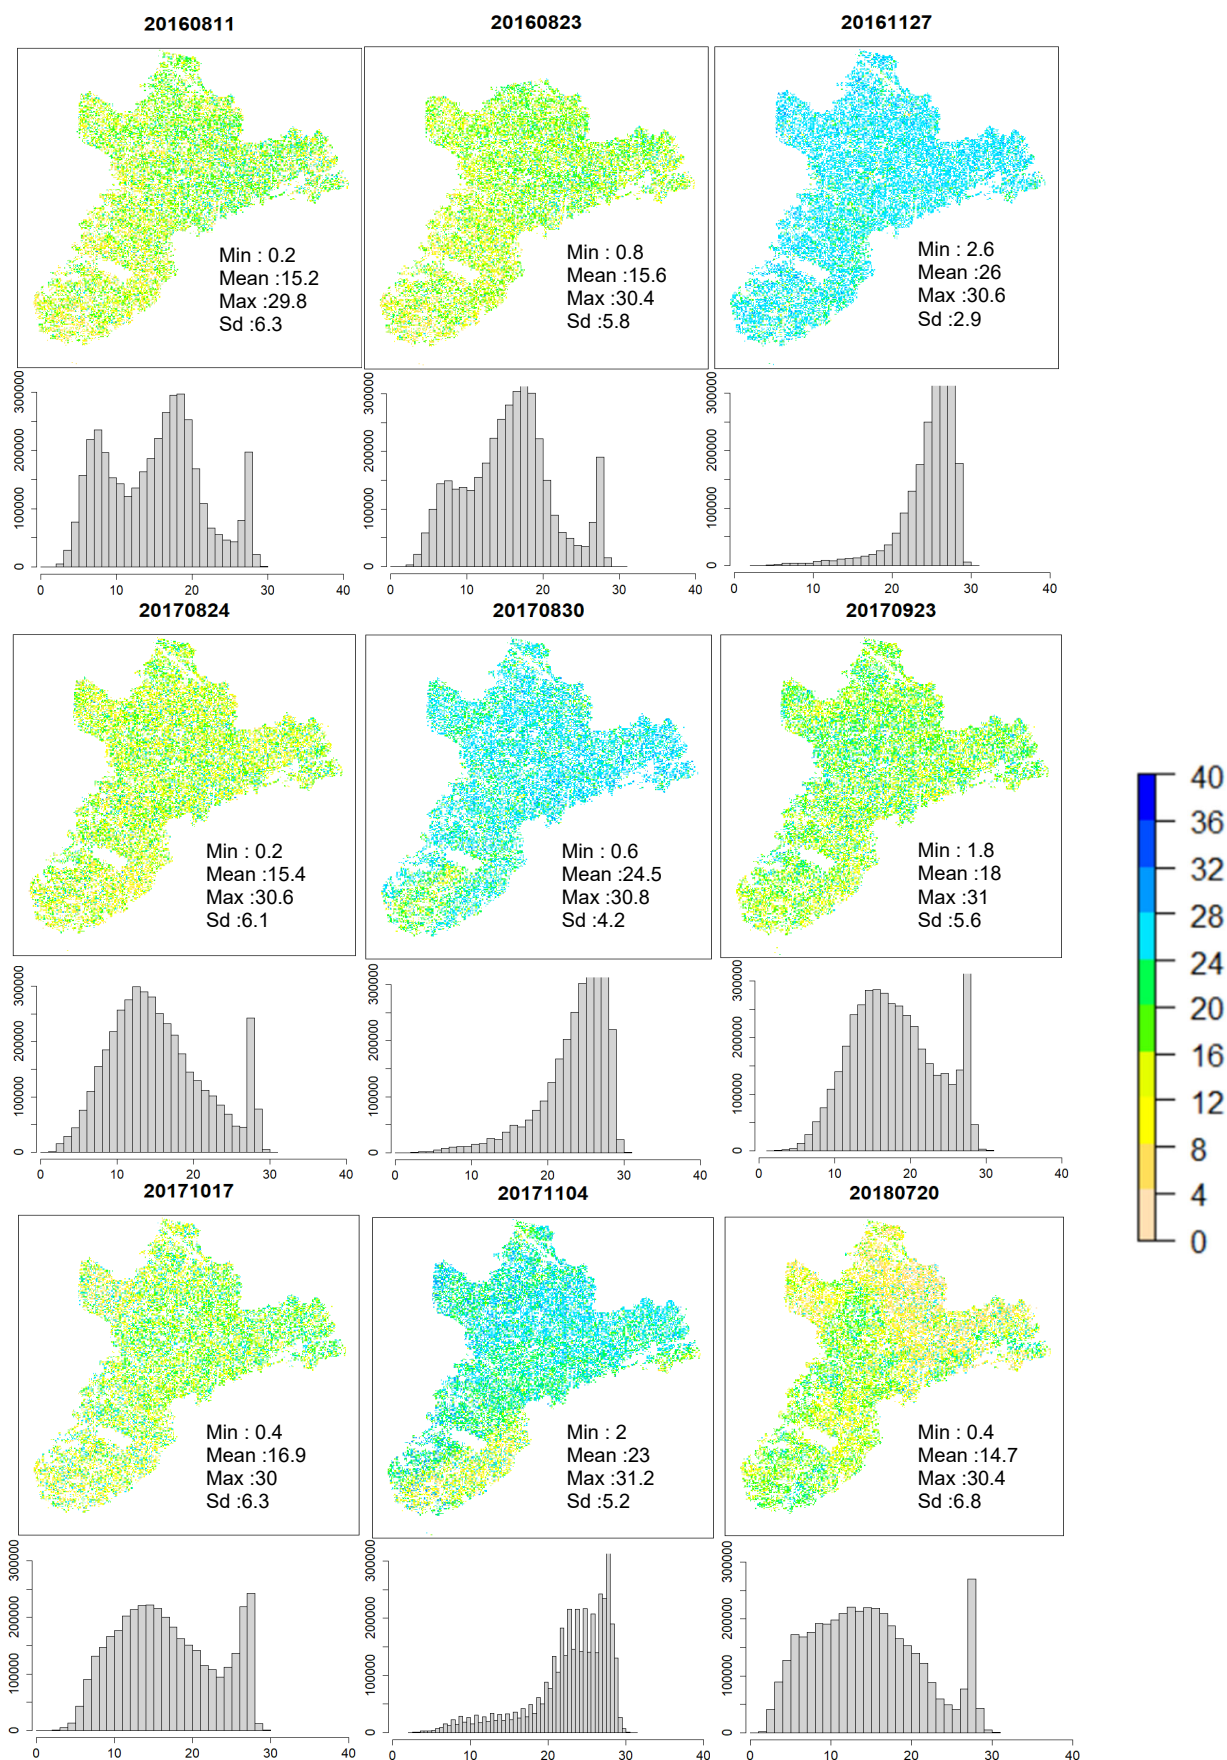

**Figure S2. Supplementary material**

Soil moisture products and their respective histograms between July and November 2016-2021.(values are in vol.%)

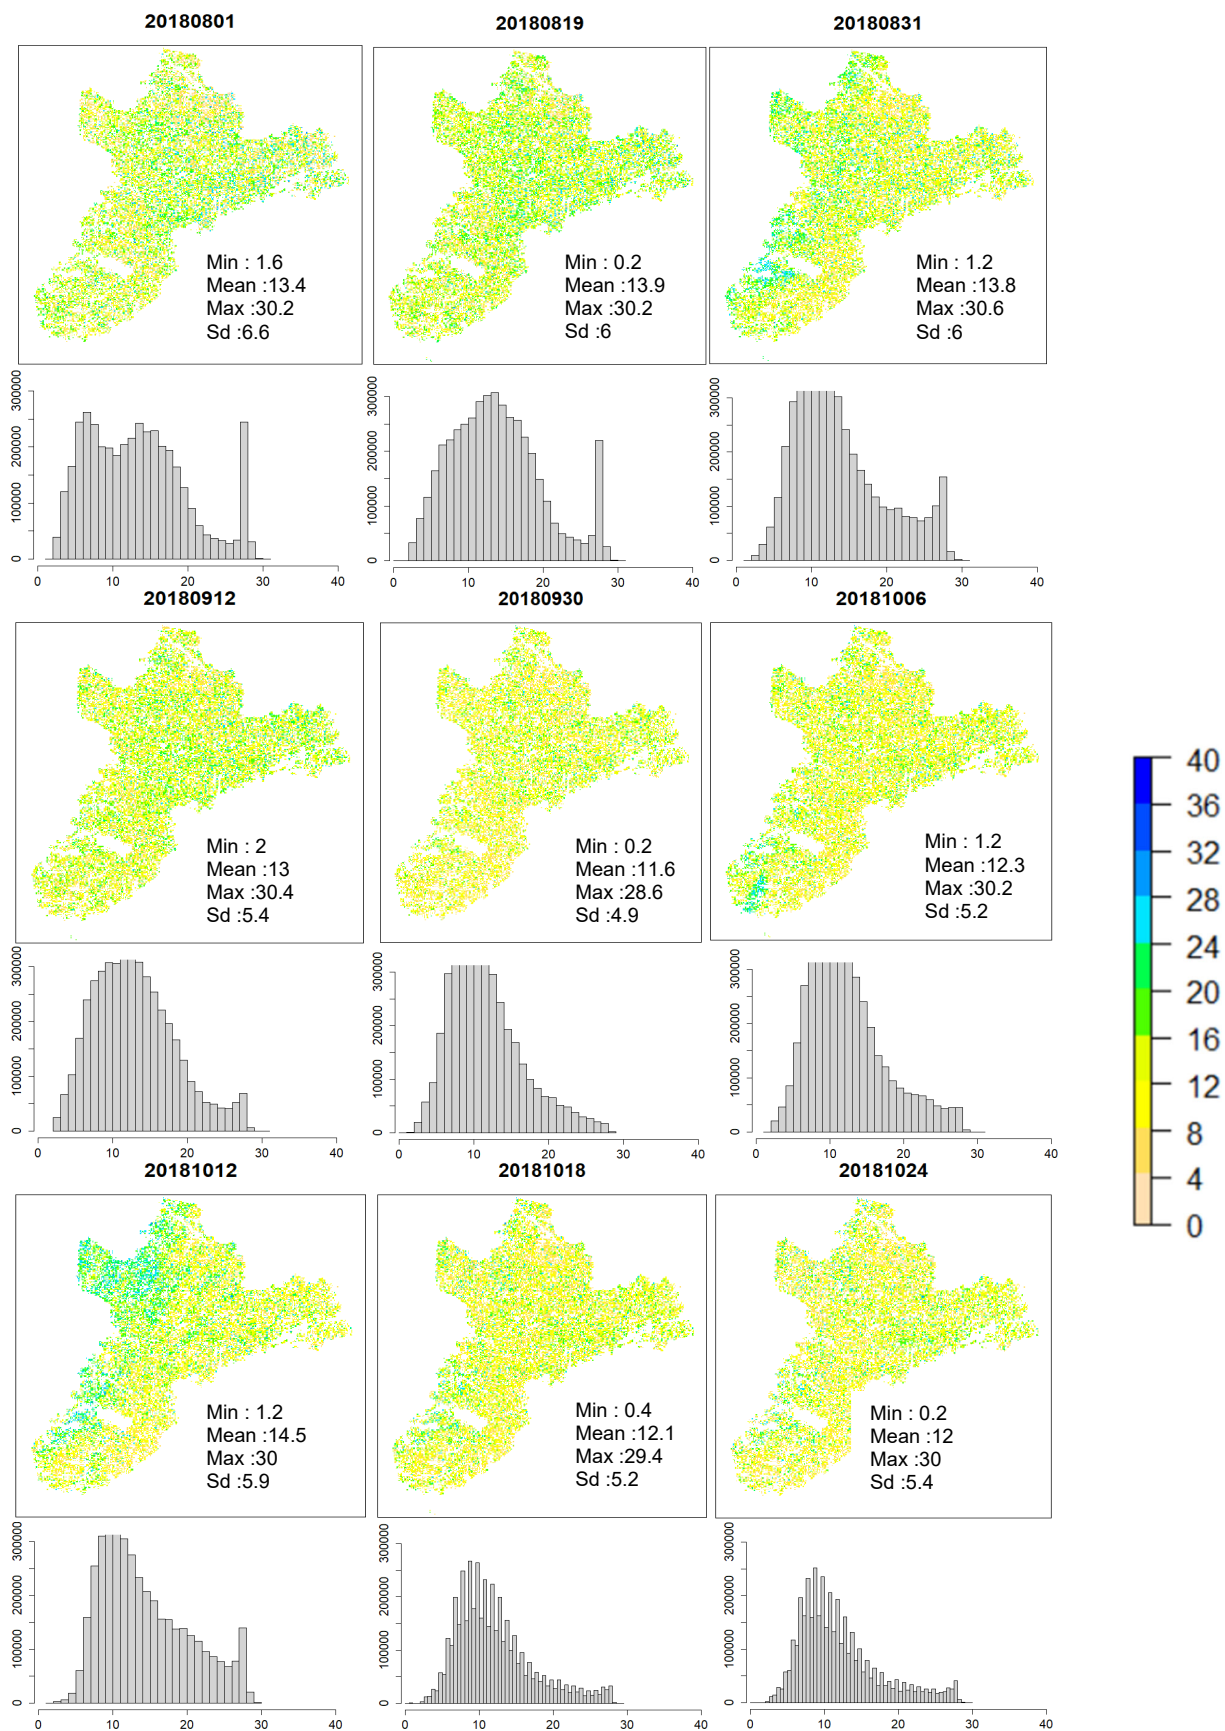

Figure S2. continued

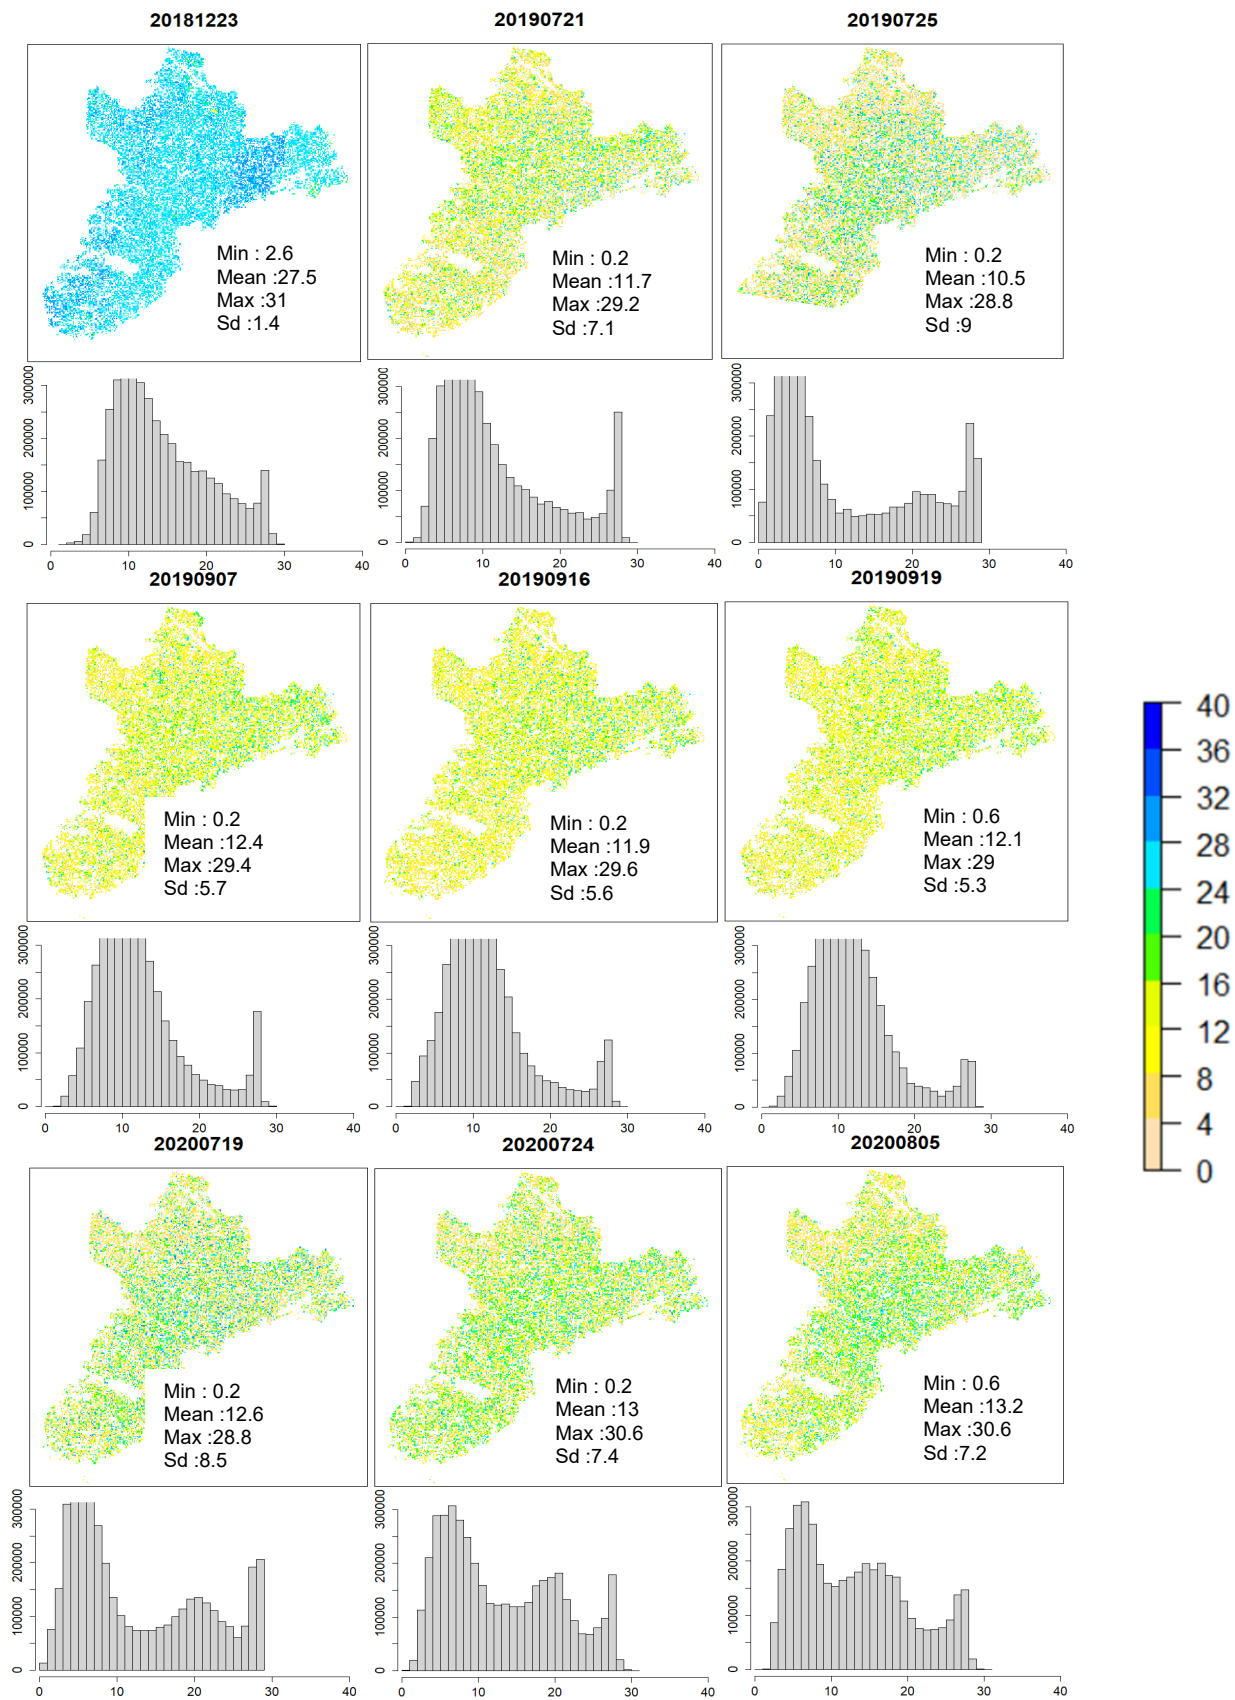

Figure S2. continued



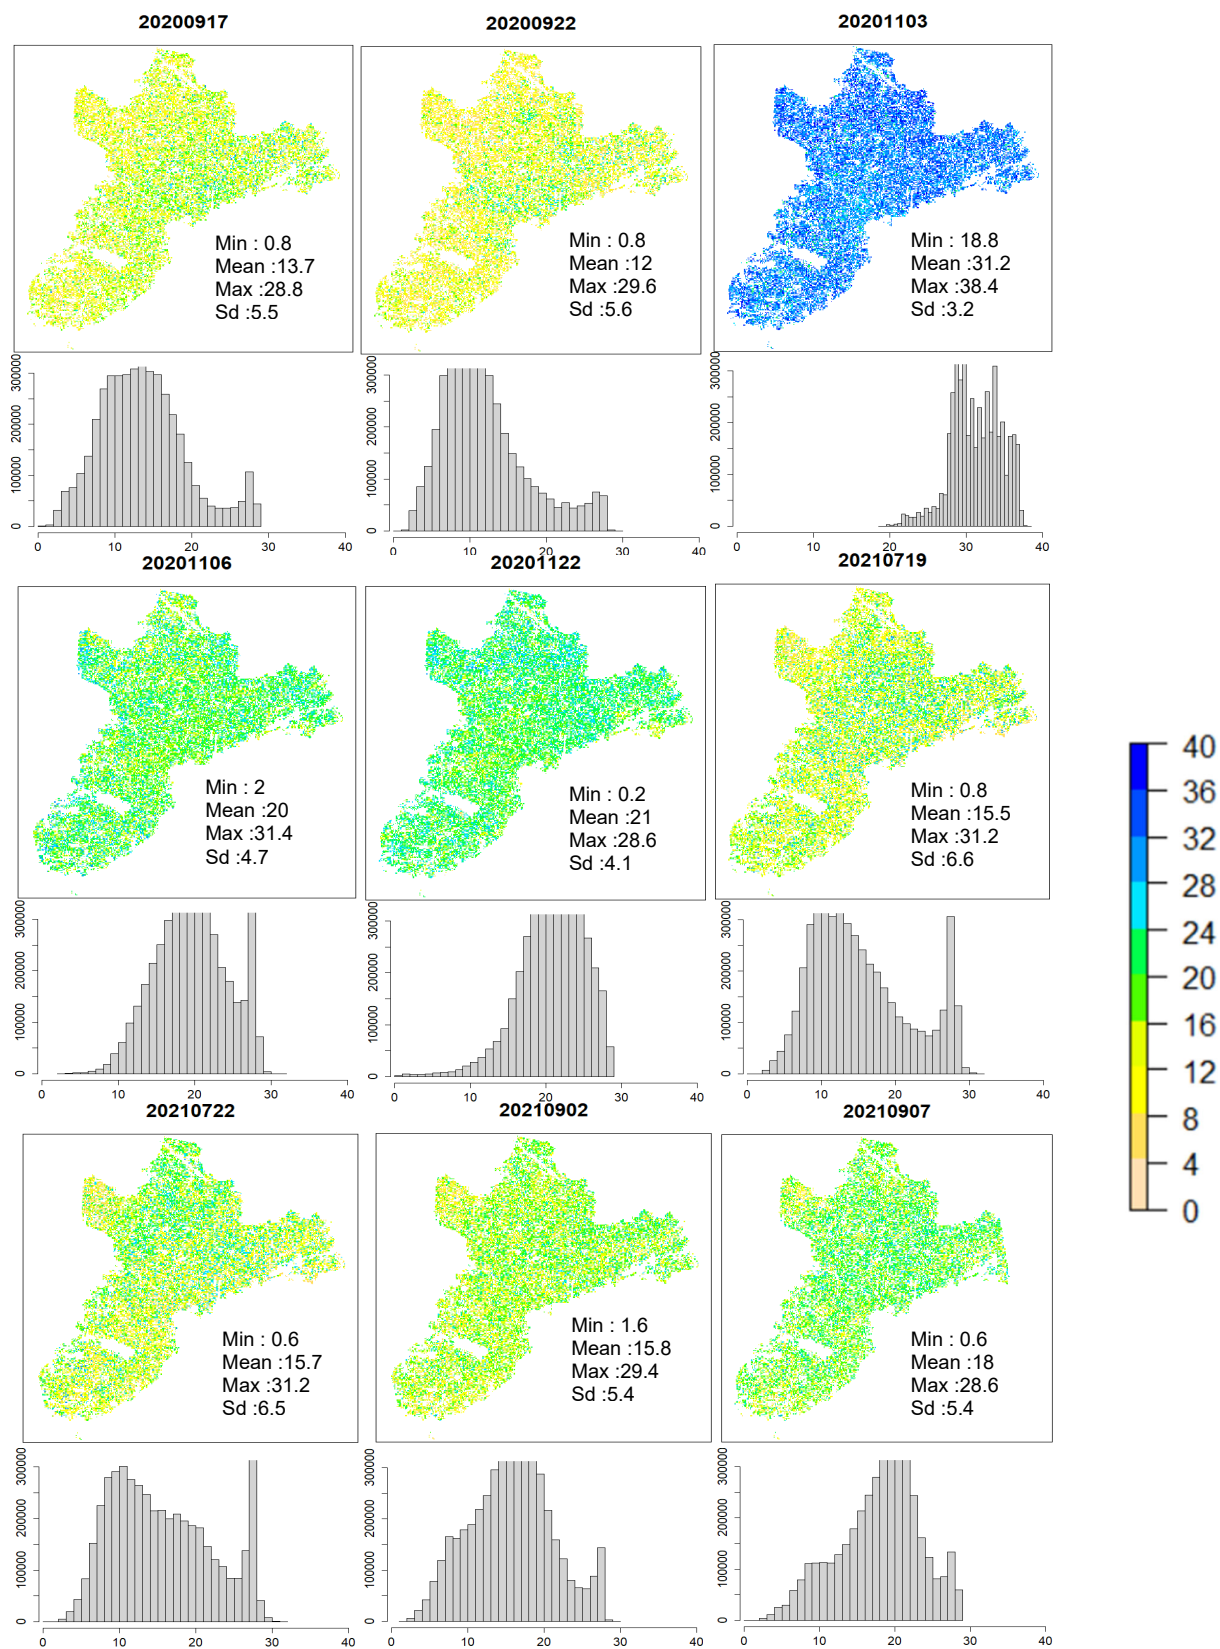

Figure S2. continued

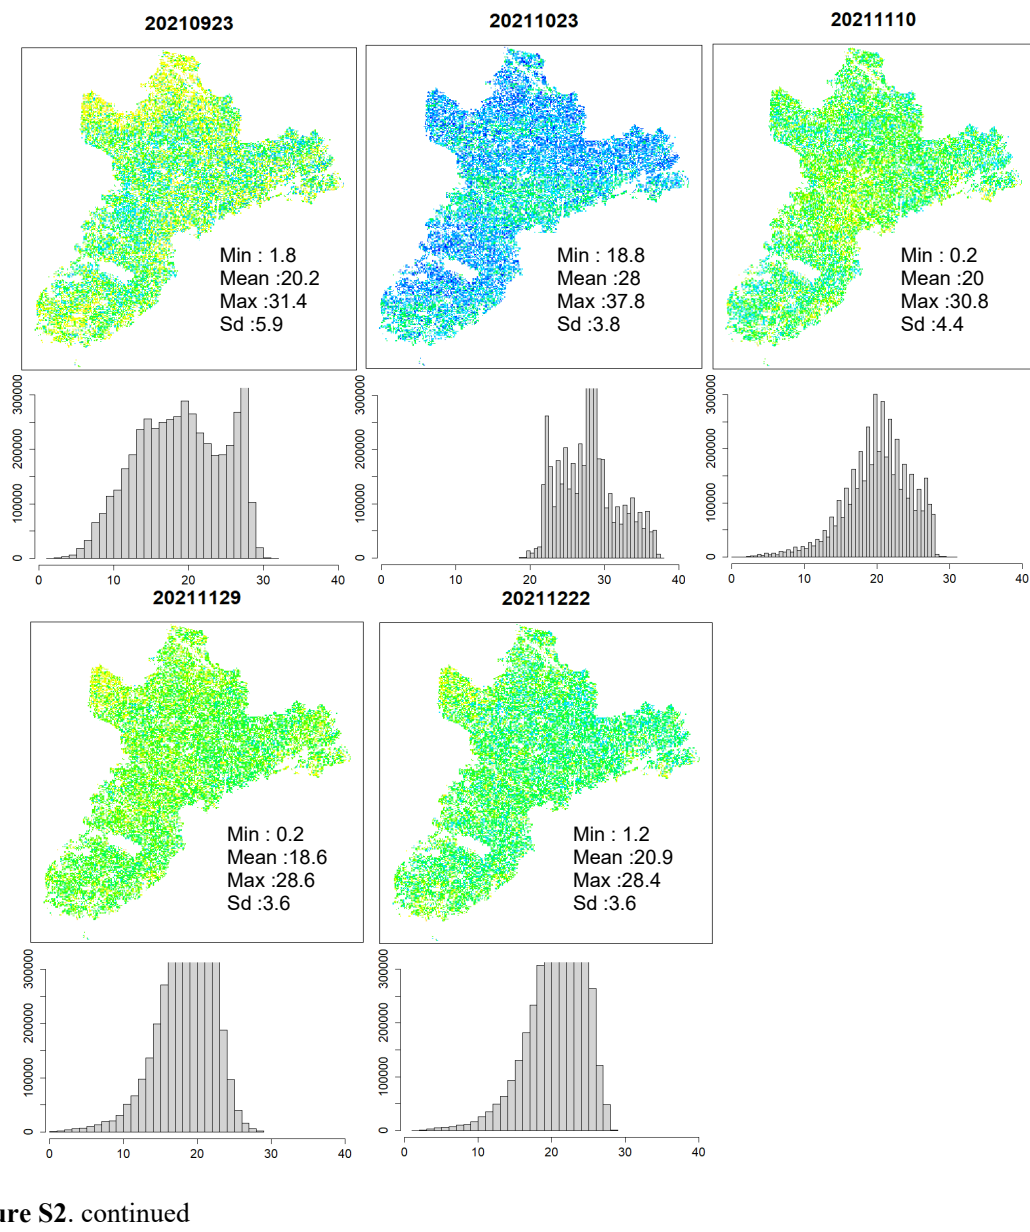

Figure S2. continued

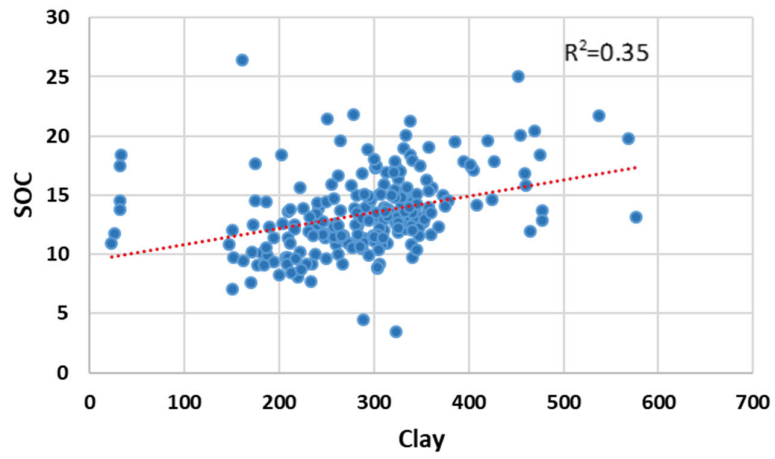

**Figure S3.** Relationship between SOC and clay from sampling locations in Beauce
